# Supplementary material
Source: HighWire-hosted journal article supplement (https://www.highwirestage.com/highwire/filestream/60542/field_highwire_adjunct_files/0/17-00608.pdf)
Supplement: 17-00608.pdf [file 17-00608.pdf]

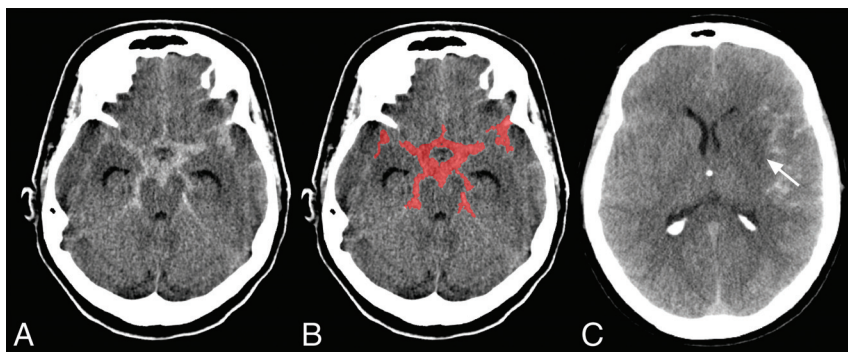

**ON-LINE FIGURE.** A, Axial slice of a baseline noncontrast CT scan of a patient with aSAH due to a ruptured middle cerebral artery aneurysm prior to developing signs of DCI. B, Quantified 34-mL cisternal blood. C, Axial slice of a noncontrast CT scan of the same patient 4 days after ictus with clinical signs of DCI after a successful coiling procedure without thromboembolic complications. This image shows a hypodensity in the left middle cerebral artery territory indicative of recent ischemia.
